# Supplementary material
Source: PubMed Central journal article supplement (PMC6583045)

## Supplementary Online Content

Quinn GE, Ying Q-S, Bell EF, et al; G-ROP Study Group. Incidence and early course of retinopathy of prematurity: secondary analysis of the Postnatal Growth and Retinopathy of Prematurity (G-ROP) Study. *JAMA Ophthalmol*. Published online September 20, 2018. doi:10.1001/jamaophthalmol.2018.4290

**eFigure:** Postmenstrual Age at Onset of Stage 1, Stage 2, and Stage 3 ROP

This supplementary material has been provided by the authors to give readers additional information about their work.

**PMA at onset of Stage 1, Stage 2 and Stage 3 ROP**

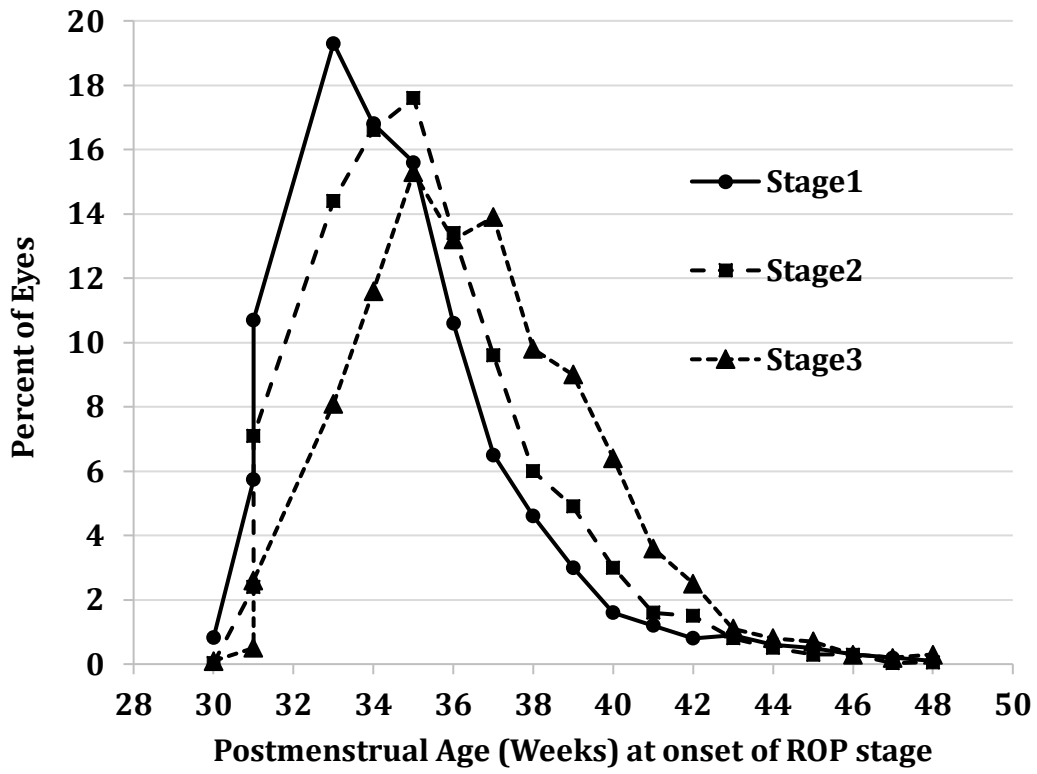

Supplement: jamaophthalmol-136-1383-s001.pdf [file jamaophthalmol-136-1383-s001.pdf]
